# Supplementary material for: miR-381-3p Involves in Glioma Progression by Suppressing Tumor-Promoter Factor ANTXR1
Source: Hindawi journal article supplement (doi:10.1155/2021/4883509), 2021-12-16
Supplement: f1 [file 4883509.f1.zip]

Archive with 2 entries (2 files):
- Fig S1.pdf
- Supplementary descriptio1.docx
