# Supplementary material for: miR-381-3p Involves in Glioma Progression by Suppressing Tumor-Promoter Factor ANTXR1
Source: Hindawi journal article supplement (doi:10.1155/2021/4883509), 2021-12-16
Supplement: f1 [file 4883509.f1.zip › Supplementary descriptio1.docx]

Supplementary description

**Supplementary Fig. 1 Potential target genes of miR-381-3p based on bioinformatics analysis**

(A) DE_mRNAs are shown in the volcano plot; (B) 13 genes with binding sites with miR-381-3p; (C) Correlation of miR-381-3p and 13 overlapping mRNAs.
