# Supplementary figures and images for: miR-381-3p Involves in Glioma Progression by Suppressing Tumor-Promoter Factor ANTXR1
Source: Hindawi journal article supplement (doi:10.1155/2021/4883509), 2021-12-16

A

## mRNA\_Volcano

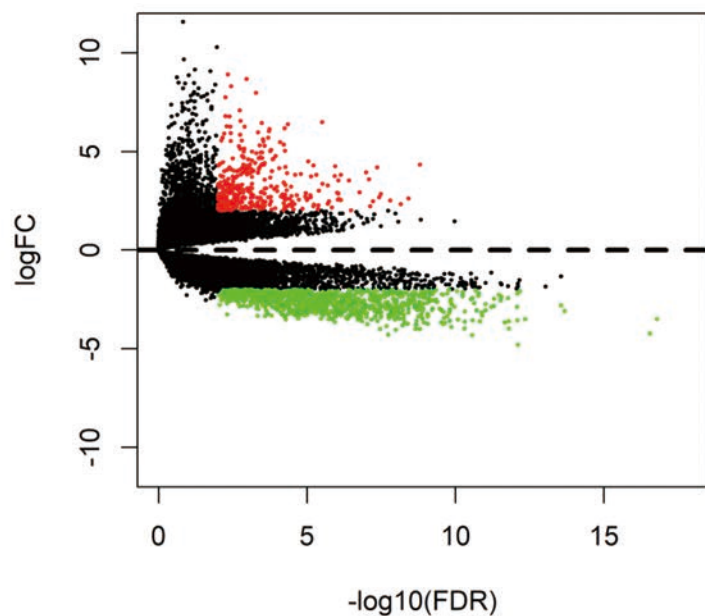

B

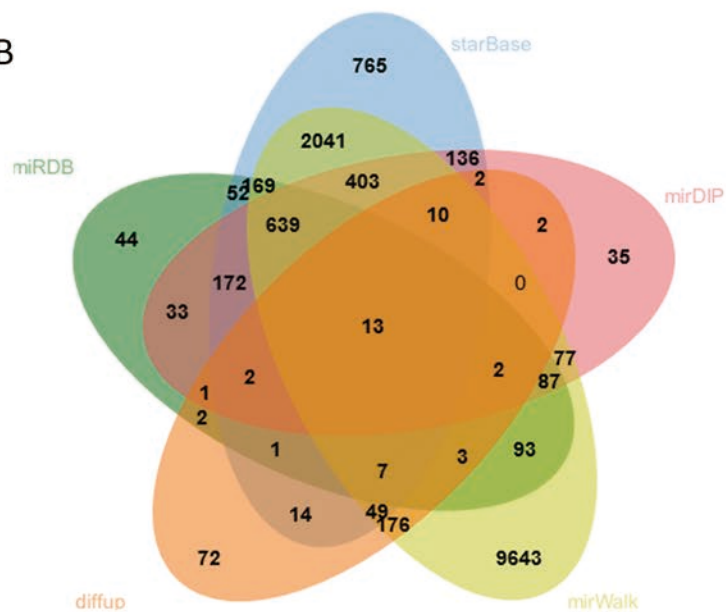

C

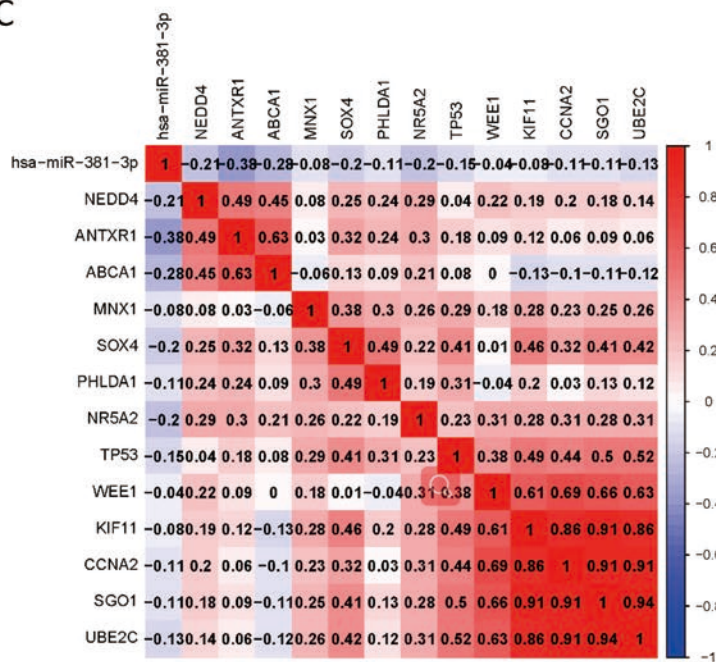

Cor=-0.38 (pvalue=1.093e-19)

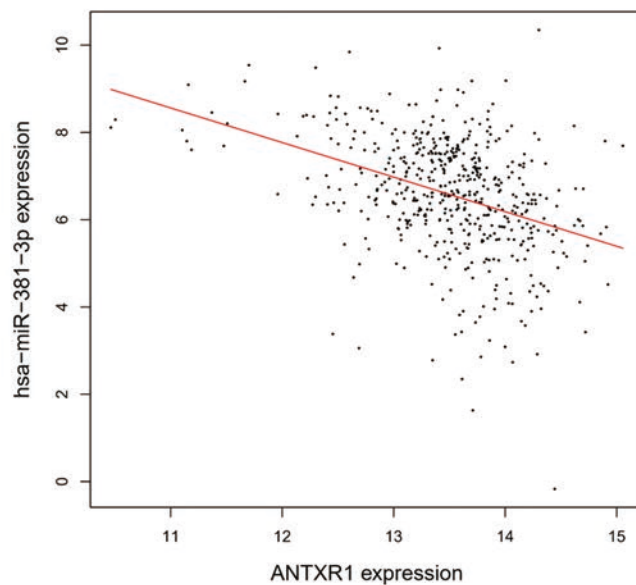

Supplement: f1 [file 4883509.f1.zip › Fig S1.pdf]
